# Supplementary material for: ESBL-Positive Enterobacteriaceae from Dogs of Santiago and Boa Vista Islands, Cape Verde: A Public Health Concern
Source: MDPI journal article supplement (doi:10.3390/antibiotics12030447), 2023-02-23
Supplement: s1 [file s1]

## Supplementary file – 2

**Table S2.** Results of the ESBL screening and confirmation, and identification protocols of the Enterobacteriaceae isolates.

| Sample (No) | Isolate (No) | Colour on ChromID ESBL   | Gram | Oxidase | MAC | Identification technique | ID                            | MDDST |
|-------------|--------------|--------------------------|------|---------|-----|--------------------------|-------------------------------|-------|
| 1           | 1a           | Pink to red              | Neg  | Neg     | Neg | IMViC                    | <i>Morganella morganii</i>    | Pos   |
| 5           | 5a           | Pink to red              | Neg  | Neg     | Pos | IMViC                    | <i>E.coli</i>                 | Pos   |
| 5           | 5b           | Dark to light brown      | Neg  | Neg     | Pos | IMViC                    | <i>E.coli</i>                 | Pos   |
| 5           | 5c           | Bluish green to brownish | Neg  | Neg     | Pos | IMViC                    | <i>E.coli</i>                 | Pos   |
| 5           | 5d           | Bluish green to brownish | Neg  | Neg     | Pos | IMViC                    | <i>E.coli</i>                 | Pos   |
| 5           | 5e           | Bluish green to brownish | Neg  | Neg     | Neg | IMViC                    | <i>Proteus mirabilis</i>      | Neg   |
| 5           | 5f           | Bluish green to brownish | Neg  | Neg     | Neg | IMViC                    | <i>Proteus mirabilis</i>      | Neg   |
| 10          | 10a          | Bluish green to brownish | Neg  | Neg     | Pos | API 20E                  | <i>Citrobacter freundii</i>   | Pos   |
| 10          | 10b          | Bluish green to brownish | Neg  | Neg     | Pos | API 20E                  | <i>Citrobacter freundii</i>   | Pos   |
| 10          | 10d          | Bluish green to brownish | Neg  | Neg     | Pos | API 20E                  | <i>Citrobacter freundii</i>   | Pos   |
| 13          | 13a          | Pink to red              | Neg  | Neg     | Neg | API 20E                  | <i>E.coli</i>                 | Pos   |
| 14          | 14a          | Dark to light brown      | Neg  | Neg     | Neg | API 20E                  | <i>Proteus vulgaris</i>       | Neg   |
| 14          | 14c          | Dark to light brown      | Neg  | Neg     | Neg | IMViC                    | <i>Proteus sp.</i>            | Neg   |
| 17          | 17a          | Pink to red              | Neg  | Neg     | Pos | IMViC                    | <i>E.coli</i>                 | Pos   |
| 22          | 22a          | Bluish green to brownish | Neg  | Neg     | Pos | IMViC                    | <i>Enterobacter aerogenes</i> | Neg   |
| 24          | 24a          | Pink to red              | Neg  | Neg     | Pos | IMViC                    | <i>E.coli</i>                 | Pos   |
| 26          | 26a          | Pink to red              | Neg  | Neg     | Neg | IMViC                    | <i>Proteus mirabilis</i>      | Pos   |
| 26          | 26b          | Dark to light brown      | Neg  | Neg     | Neg | IMViC                    | <i>Proteus mirabilis</i>      | Pos   |
| 27          | 27a          | Pink to red              | Neg  | Neg     | Pos | IMViC                    | <i>E.coli</i>                 | Pos   |

number (No); negative (Neg); positive (Pos); MacConkey agar (MAC); identification (ID).

Table S2. *cont.*

| Sample (No) | Isolate (No) | Colour on ChromID ESBL   | Gram | Oxidase | MAC | Identification technique | ID                            | MDDST |
|-------------|--------------|--------------------------|------|---------|-----|--------------------------|-------------------------------|-------|
| 28          | 28a          | Pink to red              | Neg  | Neg     | Pos | IMViC                    | <i>E.coli</i>                 | Pos   |
| 31          | 31b          | Pink to red              | Neg  | Neg     | Pos | API 20E                  | <i>Escherichia vulneris</i>   | Pos   |
| 33          | 33a.1.       | Pink to red              | Neg  | Neg     | Neg | IMViC                    | <i>Proteus mirabilis</i>      | Neg   |
| 33          | 33a.2.       | Pink to red              | Neg  | Neg     | Pos | API 20E                  | <i>E.coli</i>                 | Pos   |
| 33          | 33c          | Pink to red              | Neg  | Neg     | Neg | IMViC                    | <i>Proteus mirabilis</i>      | Neg   |
| 33          | 33b          | Dark to light brown      | Neg  | Neg     | Pos | API 20E                  | <i>E.coli</i>                 | Pos   |
| 34          | 34a          | Dark to light brown      | Neg  | Neg     | Neg | IMViC                    | <i>Proteus mirabilis</i>      | Neg   |
| 34          | 34b          | Pink to red              | Neg  | Neg     | Neg | API 20E                  | <i>Proteus mirabilis</i>      | Neg   |
| 37          | 37a          | Bluish green to brownish | Neg  | Neg     | Neg | API 20E                  | <i>Klebsiella pneumoniae</i>  | Pos   |
| 37          | 37b          | Pink to red              | Neg  | Neg     | Pos | IMViC                    | <i>Enterobacter aerogenes</i> | Neg   |
| 38          | 38a          | Dark to light brown      | Neg  | Neg     | Pos | API 20E                  | <i>E.coli</i>                 | Pos   |
| 38          | 38b.1.       | Pink to red              | Neg  | Neg     | Neg | IMViC                    | <i>Proteus mirabilis</i>      | Neg   |
| 38          | 38b.2.       | Pink to red              | Neg  | Neg     | Neg | IMViC                    | <i>Proteus mirabilis</i>      | Neg   |
| 38          | 38c          | Pink to red              | Neg  | Neg     | Neg | IMViC                    | <i>Proteus mirabilis</i>      | Neg   |
| 39          | 39a          | Pink to red              | Neg  | Neg     | Neg | API 20E                  | <i>Proteus penneri</i>        | Neg   |
| 39          | 39c          | Pink to red              | Neg  | Neg     | Pos | IMViC                    | <i>E.coli</i>                 | Pos   |
| 39          | 39b          | Bluish green to brownish | Neg  | Neg     | Neg | API 20E                  | <i>Proteus penneri</i>        | Neg   |
| 39          | 39d          | Bluish green to brownish | Neg  | Neg     | Neg | API 20E                  | <i>Enterobacter cloacae</i>   | Pos   |
| 44          | 44a          | Dark to light brown      | Neg  | Neg     | Pos | IMViC                    | <i>E.coli</i>                 | Pos   |
| 46          | 46a          | Pink to red              | Neg  | Neg     | Pos | API 20E                  | <i>E.coli</i>                 | Pos   |
| 46          | 46c          | Pink to red              | Neg  | Neg     | Pos | API 20E                  | <i>Escherichia vulneris</i>   | Pos   |
| 48          | 48a          | Pink to red              | Neg  | Neg     | Pos | IMViC                    | <i>E.coli</i>                 | Pos   |
| 49          | 49a          | Pink to red              | Neg  | Neg     | Pos | IMViC                    | <i>E.coli</i>                 | Pos   |

number (No); negative (Neg); positive (Pos); MacConkey agar (MAC); identification (ID).

Table S2. *cont.*

| Sample (No) | Isolate (No) | Colour on ChromID ESBL   | Gram | Oxidase | MAC | Identification technique | ID                            | MDDST |
|-------------|--------------|--------------------------|------|---------|-----|--------------------------|-------------------------------|-------|
| 50          | 50a          | Bluish green to brownish | Neg  | Neg     | Pos | IMViC                    | <i>Enterobacter aerogenes</i> | Neg   |
| 59          | 59a          | Pink to red              | Neg  | Neg     | Pos | IMViC                    | <i>E.coli</i>                 | Pos   |
| 66          | 66b.1.       | Bluish green to brownish | Neg  | Neg     | Pos | IMViC                    | <i>Klebsiella pneumoniae</i>  | Pos   |
| 66          | 66b.2.       | Bluish green to brownish | Neg  | Neg     | Pos | IMViC                    | <i>Klebsiella pneumoniae</i>  | Pos   |
| 66          | 66c.1.       | Pink to red              | Neg  | Neg     | Pos | IMViC                    | <i>Klebsiella pneumoniae</i>  | Pos   |
| 66          | 66c.2.       | Pink to red              | Neg  | Neg     | Neg | IMViC                    | <i>Proteus mirabilis</i>      | Neg   |
| 68          | 68b.1.       | Pink to red              | Neg  | Neg     | Pos | IMViC                    | <i>E.coli</i>                 | Pos   |
| 75          | 75a          | Dark to light brown      | Neg  | Neg     | Neg | IMViC                    | <i>Proteus sp.</i>            | Pos   |
| 83          | 83a          | Pink to red              | Neg  | Neg     | Pos | IMViC                    | <i>E.coli</i>                 | Pos   |
| 83          | 83c          | Bluish green to brownish | Neg  | Neg     | Pos | IMViC                    | <i>E.coli</i>                 | Pos   |
| 86          | 86a          | Pink to red              | Neg  | Neg     | Pos | IMViC                    | <i>E.coli</i>                 | Pos   |
| 86          | 86b          | Dark to light brown      | Neg  | Neg     | Pos | API 20E                  | <i>E.coli</i>                 | Pos   |
| 86          | 86c.1.       | Dark to light brown      | Neg  | Neg     | Neg | API 20E                  | <i>Hafnia alvei</i>           | Neg   |
| 88          | 88a          | Pink to red              | Neg  | Neg     | Pos | IMViC                    | <i>E.coli</i>                 | Pos   |
| 89          | 89a.1.       | Pink to red              | Neg  | Neg     | Pos | IMViC                    | <i>E.coli</i>                 | Pos   |
| 91          | 91a          | Pink to red              | Neg  | Neg     | Pos | IMViC                    | <i>E.coli</i>                 | Pos   |
| 91          | 91b.1.       | Pink to red              | Neg  | Neg     | Pos | IMViC                    | <i>E.coli</i>                 | Pos   |
| 94          | 94a.1.       | Pink to red              | Neg  | Neg     | Neg | IMViC                    | <i>Morganella morganii</i>    | Pos   |
| 94          | 94a.2.       | Pink to red              | Neg  | Neg     | Neg | IMViC                    | <i>Proteus mirabilis</i>      | Neg   |
| 94          | 94a.3.       | Pink to red              | Neg  | Neg     | Pos | IMViC                    | <i>E.coli</i>                 | Pos   |
| 94          | 94a.4.       | Pink to red              | Neg  | Neg     | Neg | IMViC                    | <i>Morganella morganii</i>    | Pos   |
| 94          | 94a.5.       | Pink to red              | Neg  | Neg     | Neg | IMViC                    | <i>Morganella morganii</i>    | Pos   |

number (No); negative (Neg); positive (Pos); MacConkey agar (MAC); identification (ID).

Table S2. *cont.*

| Sample (No) | Isolate (No) | Colour on ChromID ESBL   | Gram | Oxidase | MAC | Identification technique | ID                            | MDDST |
|-------------|--------------|--------------------------|------|---------|-----|--------------------------|-------------------------------|-------|
| 95          | 95a.1.       | Pink to red              | Neg  | Neg     | Pos | IMViC                    | <i>E.coli</i>                 | Pos   |
| 95          | 95b          | dark to light brown      | Neg  | Neg     | Pos | API 20E                  | <i>Escherichia vulneris</i>   | Pos   |
| 95          | 95c.1.       | dark to light brown      | Neg  | Neg     | Neg | IMViC                    | <i>Proteus mirabilis</i>      | Pos   |
| 95          | 95c.2.       | dark to light brown      | Neg  | Neg     | Neg | IMViC                    | <i>Proteus mirabilis</i>      | Neg   |
| 98          | 98a.1.       | Pink to red              | Neg  | Neg     | Neg | IMViC                    | <i>Morganella morganii</i>    | Neg   |
| 98          | 98b          | bluish green to brownish | Neg  | Neg     | Pos | IMViC                    | <i>Enterobacter aerogenes</i> | Neg   |

number (No); negative (Neg); positive (Pos); MacConkey agar (MAC); identification (ID).
