# Supplementary material for: ESBL-Positive Enterobacteriaceae from Dogs of Santiago and Boa Vista Islands, Cape Verde: A Public Health Concern
Source: MDPI journal article supplement (doi:10.3390/antibiotics12030447), 2023-02-23
Supplement: s1 [file s1]

## Supplementary file - 1

**Table S1.** Sampling data.

| Sample (No) | Sampling location | Date     | Estimated age interval (years) | Sex | Spay/Neuter Status | Confinement status | BCS | Presence of external parasites | Shelter |
|-------------|-------------------|----------|--------------------------------|-----|--------------------|--------------------|-----|--------------------------------|---------|
| 1           | Bons Amigos       | 11/09/21 | < 1                            | F   | No                 | C                  | 2   | No                             | No      |
| 2           | Bons Amigos       | 11/09/21 | < 0,5                          | M   | No                 | C                  | 3   | No                             | No      |
| 3           | Bons Amigos       | 11/09/21 | > 5                            | M   | No                 | C                  | 3   | No                             | No      |
| 4           | Bons Amigos       | 11/09/21 | < 0,5                          | M   | No                 | C                  | 3   | Yes                            | No      |
| 5           | Bons Amigos       | 13/09/21 | > 5                            | M   | No                 | C                  | 3   | Yes                            | No      |
| 6           | Bons Amigos       | 13/09/21 | < 5                            | F   | No                 | NC                 | 2   | No                             | No      |
| 7           | Bons Amigos       | 13/09/21 | < 0,5                          | F   | No                 | NC                 | 3   | Yes                            | No      |
| 8           | Bons Amigos       | 13/09/21 | > 5                            | M   | No                 | C                  | 3   | Yes                            | No      |
| 9           | Bons Amigos       | 16/09/21 | > 5                            | M   | No                 | NC                 | 2   | Yes                            | No      |
| 10          | Bons Amigos       | 16/09/21 | < 5                            | F   | No                 | NC                 | 2   | Yes                            | No      |
| 11          | Bons Amigos       | 17/09/21 | < 5                            | M   | No                 | NC                 | 1   | Yes                            | No      |
| 12          | Bons Amigos       | 18/09/21 | <5                             | M   | No                 | C                  | 3   | Yes                            | No      |
| 13          | Bons Amigos       | 18/09/21 | >5                             | M   | No                 | C                  | 3   | Yes                            | No      |
| 14          | Bons Amigos       | 20/09/21 | >5                             | F   | No                 | C                  | 4   | Yes                            | No      |
| 15          | Bons Amigos       | 20/09/21 | <5                             | F   | No                 | C                  | 3   | Yes                            | No      |
| 16          | Bons Amigos       | 20/09/21 | <5                             | F   | No                 | C                  | 2   | Yes                            | No      |
| 17          | Bons Amigos       | 22/09/21 | >5                             | M   | No                 | C                  | 3   | Yes                            | No      |
| 18          | Bons Amigos       | 22/09/21 | <5                             | F   | No                 | C                  | 2   | Yes                            | No      |
| 19          | Bons Amigos       | 22/09/21 | >5                             | M   | No                 | C                  | 3   | Yes                            | No      |

number (No); female (F); male (M); confined (C); not confined (ND); Body Condition Score (BCS).

Table S1. cont.

| Sample (No) | Sampling location | Date     | Estimated age interval (years) | Sex | Spay/Neuter Status | Confinement status | BCS | Presence of external parasites | Shelter |
|-------------|-------------------|----------|--------------------------------|-----|--------------------|--------------------|-----|--------------------------------|---------|
| 20          | Bons Amigos       | 23/09/21 | >5                             | F   | No                 | NC                 | 1   | Yes                            | No      |
| 21          | Bons Amigos       | 23/09/21 | <5                             | F   | No                 | NC                 | 3   | Yes                            | No      |
| 22          | Bons Amigos       | 24/09/21 | <5                             | F   | No                 | NC                 | 1   | Yes                            | No      |
| 23          | Bons Amigos       | 24/09/21 | <5                             | F   | No                 | C                  | 3   | Yes                            | No      |
| 24          | Bons Amigos       | 24/09/21 | <5                             | F   | No                 | NC                 | 1   | Yes                            | No      |
| 25          | Bons Amigos       | 24/09/21 | <5                             | F   | No                 | NC                 | 3   | Yes                            | No      |
| 26          | Bons Amigos       | 25/09/21 | <5                             | F   | No                 | NC                 | 2   | Yes                            | No      |
| 27          | Bons Amigos       | 25/09/21 | <5                             | F   | No                 | C                  | 3   | Yes                            | No      |
| 28          | Bons Amigos       | 25/09/21 | >5                             | F   | No                 | C                  | 3   | Yes                            | No      |
| 29          | Bons Amigos       | 25/09/21 | <5                             | F   | No                 | C                  | 2   | Yes                            | No      |
| 30          | Bons Amigos       | 25/09/21 | <5                             | F   | No                 | C                  | 2   | Yes                            | No      |
| 31          | Bons Amigos       | 27/09/21 | <5                             | F   | No                 | NC                 | 2   | Yes                            | No      |
| 32          | Bons Amigos       | 27/09/21 | <5                             | F   | No                 | NC                 | 2   | Yes                            | No      |
| 33          | Bons Amigos       | 27/09/21 | <5                             | F   | No                 | NC                 | 2   | Yes                            | No      |
| 34          | Bons Amigos       | 27/09/21 | <5                             | F   | No                 | NC                 | 2   | Yes                            | No      |
| 35          | Bons Amigos       | 27/09/21 | <5                             | F   | No                 | C                  | 2   | Yes                            | No      |
| 36          | Bons Amigos       | 28/09/21 | <1                             | M   | No                 | C                  | 2   | Yes                            | No      |
| 37          | Bons Amigos       | 28/09/21 | <5                             | M   | No                 | C                  | 2   | Yes                            | No      |
| 38          | Bons Amigos       | 28/09/21 | <5                             | M   | No                 | NC                 | 2   | Yes                            | No      |
| 39          | Bons Amigos       | 28/09/21 | <5                             | M   | No                 | NC                 | 2   | Yes                            | No      |
| 40          | Bons Amigos       | 28/09/21 | <5                             | F   | No                 | NC                 | 1   | Yes                            | No      |

number (No); female (F); male (M); confined (C); not confined (ND); Body Condition Score (BCS).

Table S1. cont.

| Sample (No) | Sampling location | Date     | Estimated age interval (years) | Sex | Spay/Neuter Status | Confinement status | BCS | Presence of external parasites | Shelter |
|-------------|-------------------|----------|--------------------------------|-----|--------------------|--------------------|-----|--------------------------------|---------|
| 41          | Bons Amigos       | 28/09/21 | <5                             | F   | No                 | C                  | 2   | Yes                            | No      |
| 42          | Bons Amigos       | 29/09/21 | <5                             | F   | No                 | C                  | 3   | Yes                            | No      |
| 43          | Bons Amigos       | 29/09/21 | <5                             | M   | No                 | NC                 | 2   | Yes                            | No      |
| 44          | Bons Amigos       | 29/09/21 | <5                             | M   | No                 | C                  | 3   | Yes                            | No      |
| 45          | Bons Amigos       | 29/09/21 | <5                             | F   | No                 | NC                 | 3   | Yes                            | No      |
| 46          | Bons Amigos       | 29/09/21 | <5                             | F   | No                 | NC                 | 3   | Yes                            | No      |
| 47          | Bons Amigos       | 29/09/21 | <5                             | M   | No                 | NC                 | 2   | Yes                            | No      |
| 48          | Bons Amigos       | 29/09/21 | >5                             | F   | No                 | NC                 | 4   | Yes                            | No      |
| 49          | Bons Amigos       | 29/09/21 | >5                             | F   | No                 | NC                 | 1   | Yes                            | No      |
| 50          | Bons Amigos       | 29/09/21 | <5                             | F   | No                 | NC                 | 2   | Yes                            | No      |
| 51          | Nerina            | 03/11/21 | <5                             | F   | Yes                | C                  | 3   | No                             | Yes     |
| 52          | Nerina            | 03/11/21 | <5                             | F   | Yes                | C                  | 3   | No                             | Yes     |
| 53          | Nerina            | 03/11/21 | <5                             | F   | Yes                | C                  | 3   | No                             | Yes     |
| 54          | Nerina            | 03/11/21 | <5                             | F   | Yes                | C                  | 3   | No                             | Yes     |
| 55          | Nerina            | 03/11/21 | <5                             | M   | Yes                | C                  | 3   | No                             | Yes     |
| 56          | Nerina            | 03/11/21 | <5                             | F   | Yes                | C                  | 3   | No                             | Yes     |
| 57          | Nerina            | 03/11/21 | <5                             | M   | Yes                | C                  | 3   | No                             | Yes     |
| 58          | Nerina            | 03/11/21 | <5                             | F   | Yes                | C                  | 3   | No                             | Yes     |
| 59          | Nerina            | 03/11/21 | <5                             | F   | Yes                | C                  | 3   | No                             | Yes     |
| 60          | Nerina            | 04/11/21 | <5                             | F   | Yes                | C                  | 3   | No                             | Yes     |

number (No); female (F); male (M); confined (C); not confined (ND); Body Condition Score (BCS).

Table S1. cont.

| Sample (No) | Sampling location | Date     | Estimated age interval (years) | Sex | Spay/Neuter Status | Confinement status | BCS | Presence of external parasites | Shelter |
|-------------|-------------------|----------|--------------------------------|-----|--------------------|--------------------|-----|--------------------------------|---------|
| 61          | Nerina            | 04/11/21 | <5                             | M   | Yes                | C                  | 3   | No                             | Yes     |
| 62          | Nerina            | 04/11/21 | <5                             | M   | Yes                | C                  | 3   | No                             | Yes     |
| 63          | Nerina            | 04/11/21 | <5                             | M   | Yes                | C                  | 3   | No                             | Yes     |
| 64          | Nerina            | 03/11/21 | <5                             | M   | Yes                | NC                 | 2   | Yes                            | No      |
| 65          | Nerina            | 03/11/21 | <5                             | M   | No                 | NC                 | 4   | Yes                            | No      |
| 66          | Nerina            | 03/11/21 | <1                             | M   | No                 | NC                 | 2   | Yes                            | No      |
| 67          | Nerina            | 04/11/21 | <5                             | F   | No                 | NC                 | 3   | No                             | No      |
| 68          | Nerina            | 04/11/21 | >5                             | M   | Yes                | NC                 | 3   | No                             | No      |
| 69          | Nerina            | 04/11/21 | <5                             | M   | Yes                | C                  | 3   | No                             | Yes     |
| 70          | Nerina            | 04/11/21 | <5                             | M   | Yes                | C                  | 3   | No                             | Yes     |
| 71          | Nerina            | 05/11/21 | <5                             | M   | No                 | NC                 | 2   | No                             | No      |
| 72          | Nerina            | 05/11/21 | <5                             | M   | No                 | NC                 | 3   | No                             | No      |
| 73          | Nerina            | 05/11/21 | <5                             | F   | Yes                | C                  | 3   | No                             | No      |
| 74          | Nerina            | 08/11/21 | <5                             | F   | No                 | NC                 | 3   | No                             | No      |
| 75          | Nerina            | 08/11/21 | <5                             | F   | Yes                | C                  | 2   | Yes                            | No      |
| 76          | Nerina            | 08/11/21 | <5                             | F   | Yes                | C                  | 3   | No                             | No      |
| 77          | Nerina            | 08/11/21 | <5                             | F   | Yes                | NC                 | 3   | No                             | No      |
| 78          | Nerina            | 08/11/21 | >5                             | F   | Yes                | C                  | 4   | No                             | No      |
| 79          | Nerina            | 09/11/21 | <5                             | M   | Yes                | C                  | 3   | No                             | No      |
| 80          | Nerina            | 09/11/21 | <5                             | F   | Yes                | NC                 | 3   | No                             | No      |

number (No); female (F); male (M); confined (C); not confined (NC); Body Condition Score (BCS).

Table S1. cont.

| Sample (No) | Sampling location | Date     | Estimated age interval (years) | Sex | Spay/Neuter Status | Confinement status | BCS | Presence of external parasites | Shelter |
|-------------|-------------------|----------|--------------------------------|-----|--------------------|--------------------|-----|--------------------------------|---------|
| 81          | Nerina            | 10/11/21 | <5                             | F   | Yes                | NC                 | 3   | No                             | No      |
| 82          | Nerina            | 11/11/21 | <5                             | M   | Yes                | NC                 | 3   | No                             | No      |
| 83          | Nerina            | 11/11/21 | <5                             | F   | Yes                | NC                 | 3   | No                             | No      |
| 84          | Nerina            | 15/11/21 | <5                             | F   | No                 | NC                 | 3   | No                             | No      |
| 85          | Nerina            | 15/11/21 | >5                             | M   | Yes                | NC                 | 3   | Yes                            | No      |
| 86          | Nerina            | 17/11/21 | <5                             | F   | Yes                | C                  | 3   | No                             | No      |
| 87          | Nerina            | 18/11/21 | <5                             | F   | Yes                | NC                 | 3   | No                             | No      |
| 88          | Nerina            | 18/11/21 | >5                             | F   | Yes                | NC                 | 2   | Yes                            | No      |
| 89          | Nerina            | 19/11/21 | <5                             | M   | Yes                | NC                 | 1   | No                             | No      |
| 90          | Nerina            | 22/11/21 | >5                             | M   | Yes                | C                  | 3   | Yes                            | No      |
| 91          | Nerina            | 22/11/21 | >5                             | M   | Yes                | NC                 | 3   | Yes                            | No      |
| 92          | Nerina            | 23/11/21 | <5                             | M   | No                 | NC                 | 2   | Yes                            | No      |
| 93          | Nerina            | 23/11/21 | <5                             | M   | No                 | NC                 | 2   | Yes                            | No      |
| 94          | Nerina            | 25/11/21 | <5                             | M   | Yes                | C                  | 2   | No                             | No      |
| 95          | Nerina            | 25/11/21 | <5                             | M   | No                 | NC                 | 2   | No                             | No      |
| 96          | Nerina            | 25/11/21 | >5                             | M   | No                 | NC                 | 2   | No                             | No      |
| 97          | Nerina            | 26/11/21 | <5                             | F   | No                 | C                  | 4   | No                             | No      |
| 98          | Nerina            | 26/11/21 | <5                             | M   | No                 | NC                 | 2   | Yes                            | No      |
| 99          | Nerina            | 26/11/21 | <5                             | M   | No                 | NC                 | 2   | Yes                            | No      |
| 100         | Nerina            | 30/11/21 | <5                             | F   | No                 | C                  | 3   | No                             | No      |

number (No); female (F); male (M); confined (C); not confined (ND); Body Condition Score (BCS).
